# Supplementary material for: Electric Bioimpedance Sensing for the Detection of Head and Neck Squamous Cell Carcinoma
Source: MDPI journal article supplement (doi:10.3390/diagnostics13142453), 2023-07-24
Supplement: s1 [file s1]

# Electric bioimpedance sensing for the detection of head and neck squamous cell carcinoma: a preliminary feasibility study

## Supplementary Material

### Supplementary Figures

**Figure S1:** The SmartProbe system Graphic User Interface (GUI) showing A) a system status window; B) a polar plot with a red dot indicating the impedance value measured at 100 KHz; C) system mode selection buttons; D<sub>1</sub>) optional “note” field and D<sub>2</sub>) two obligatory information fields to be filled for every patient; E) multiple-choice menus to select the calibration method and the tissues characteristics.

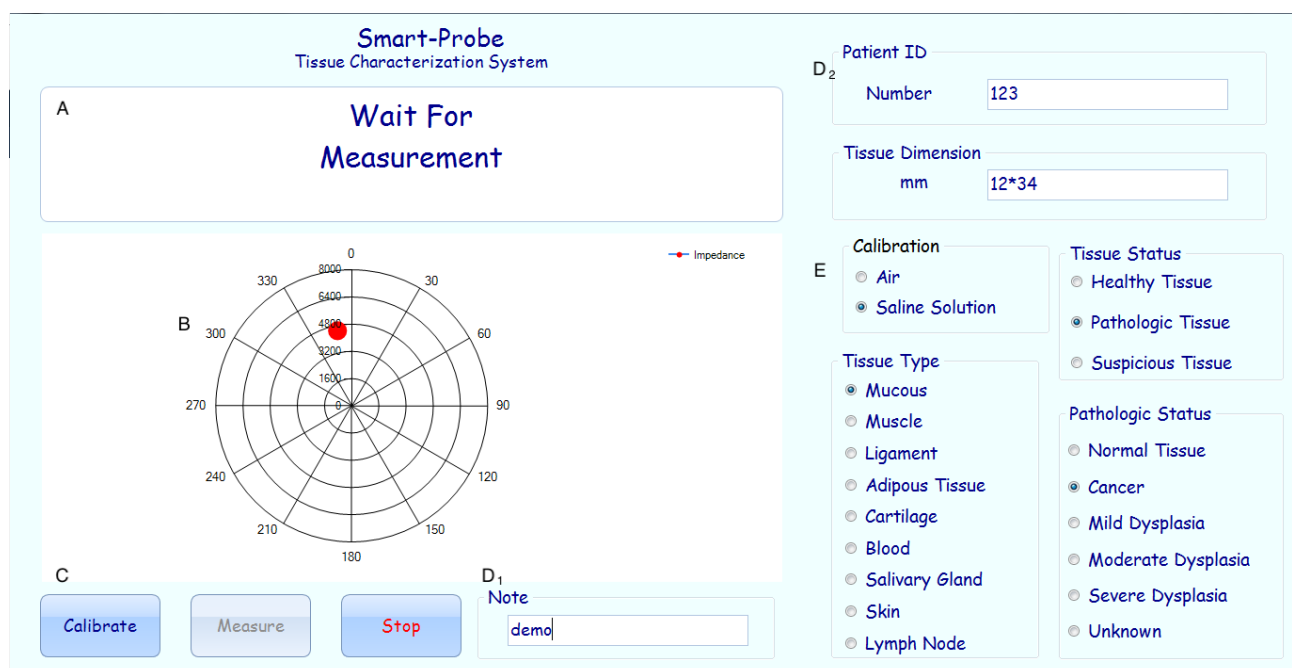

**Figure S2:** Bode plots for each tissue type. In red are represented the results of the pathological samples and in green the healthy ones.

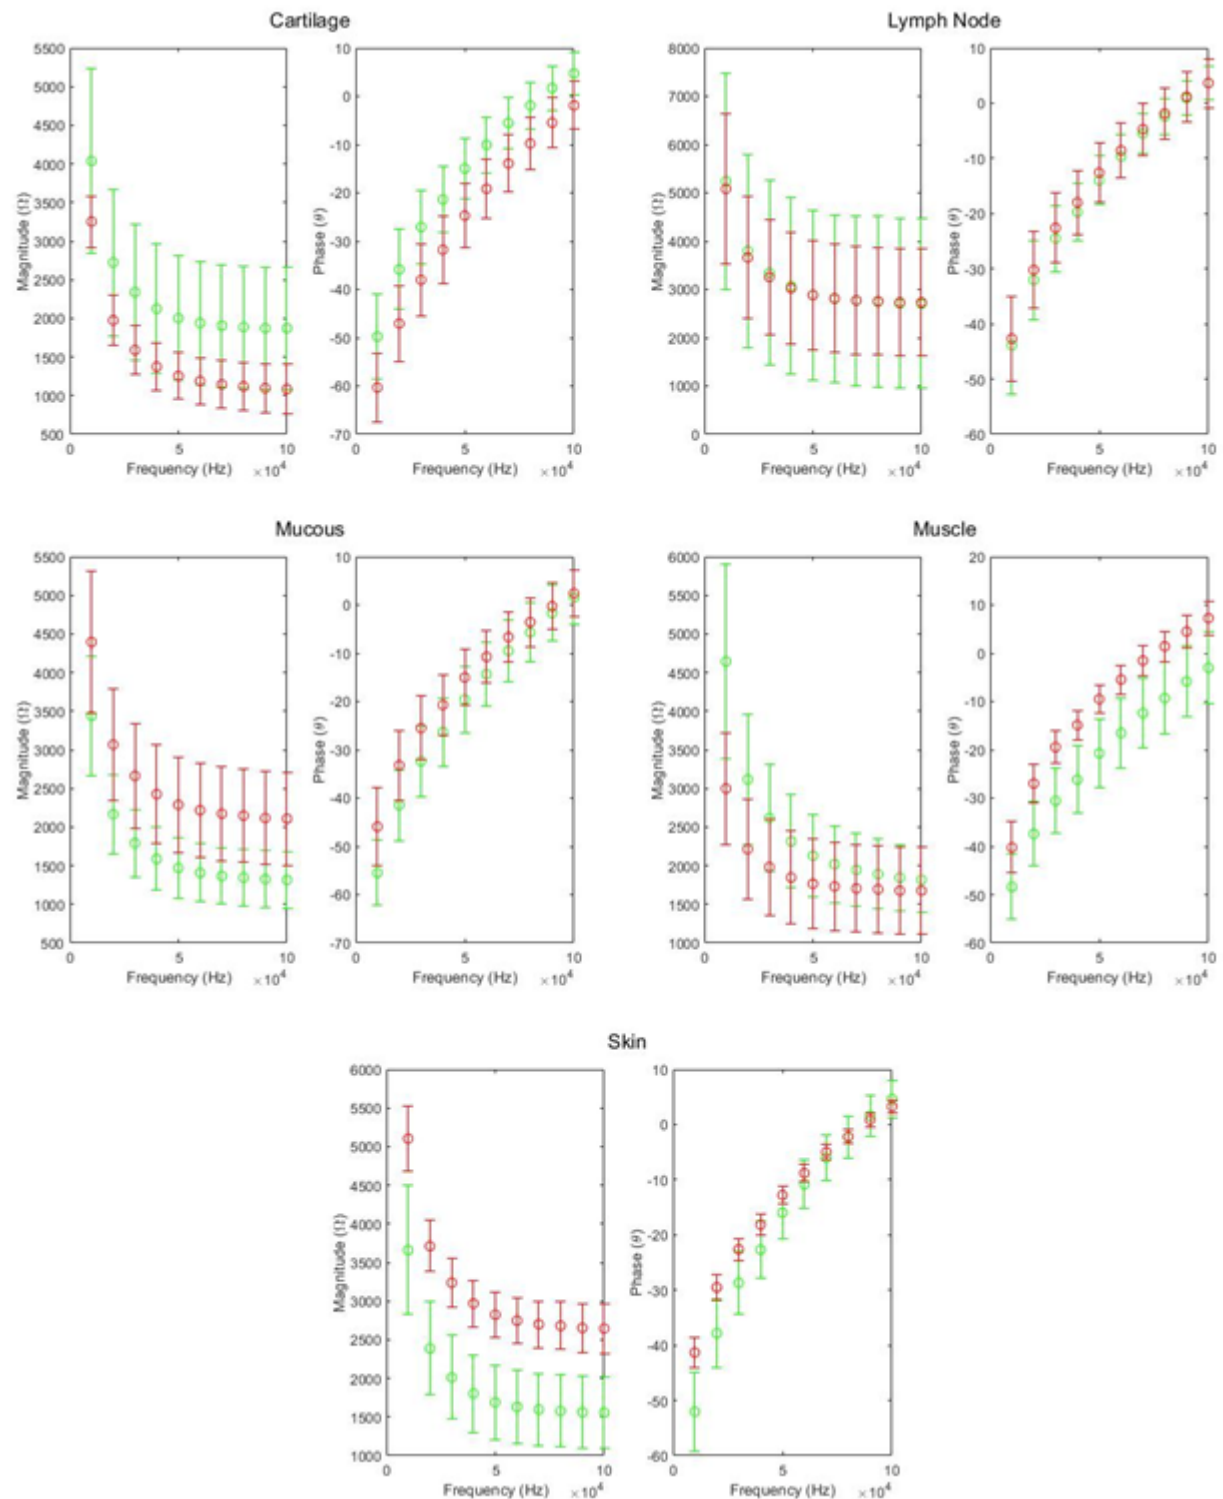

**Table S1:** Performance metrics of tissue-specific classifiers based on 10 kHz impedance values from the overall patient population (with 5-fold cross-validation). Legend: SVM, support vector machine; F1, F1 score; MCC, Matthew's Correlation Coefficient; AUC, Area under the ROC Curve.

| Method        | Type        | Mucosa | Lymph Node | Muscle | Cartilage | Skin |
|---------------|-------------|--------|------------|--------|-----------|------|
| SVM           | Sensitivity | 0.85   | 0.73       | 0.78   | 0.92      | 0.89 |
|               | Specificity | 0.78   | 0.50       | 0.96   | 1.00      | 0.95 |
|               | Accuracy    | 0.83   | 0.64       | 0.87   | 0.99      | 0.92 |
|               | F1          | 0.88   | 0.70       | 0.85   | 0.96      | 0.93 |
|               | MCC         | 0.59   | 0.24       | 0.75   | 0.95      | 0.83 |
|               | AUC         | 0.87   | 0.67       | 0.95   | 1.00      | 0.99 |
| XGBoost       | Sensitivity | 0.89   | 0.74       | 0.92   | 0.67      | 0.96 |
|               | Specificity | 0.77   | 0.51       | 0.91   | 0.93      | 0.95 |
|               | Accuracy    | 0.85   | 0.66       | 0.91   | 0.88      | 0.96 |
|               | F1          | 0.89   | 0.73       | 0.89   | 0.67      | 0.96 |
|               | MCC         | 0.66   | 0.25       | 0.82   | 0.59      | 0.91 |
|               | AUC         | 0.83   | 0.62       | 0.91   | 0.80      | 0.96 |
| Random Forest | Sensitivity | 0.90   | 0.72       | 0.93   | 0.75      | 0.93 |
|               | Specificity | 0.74   | 0.51       | 0.90   | 0.94      | 1.00 |
|               | Accuracy    | 0.85   | 0.64       | 0.91   | 0.91      | 0.96 |
|               | F1          | 0.89   | 0.72       | 0.88   | 0.75      | 0.96 |
|               | MCC         | 0.65   | 0.22       | 0.81   | 0.69      | 0.92 |
|               | AUC         | 0.87   | 0.70       | 0.97   | 0.94      | 0.96 |
